# Supplementary material
Source: MDPI journal article supplement (https://www.mdpi.com/2673-351X/5/1/6)
Supplement: s1 [file s1]

Supplement Table

**Table S1.** Detail character of patient after macrolide therapy.

| No. | Age | Sex | Causative tooth      | fistulae | Month of macrolide therapy | Outcome    | Surgical Procedures |
|-----|-----|-----|----------------------|----------|----------------------------|------------|---------------------|
| 1   | 40  | F   | 1st molar            | presence | 3 months                   | resistant  | ESS/exodontia       |
| 2   | 39  | M   | 2nd molar            | absence  | 3 months                   | responsive | ESS/exodontia       |
| 3   | 52  | F   | 1st molar            | presence | 4 months                   | resistant  | ESS/exodontia       |
| 4   | 41  | F   | 2nd bicuspid         | presence | 3 months                   | resistant  | ESS/exodontia       |
| 5   | 39  | M   | 2nd molar            | presence | 4 months                   | resistant  | —                   |
| 6   | 66  | F   | 1st and 2nd molar    | presence | 1 month                    | resistant  | ESS/exodontia       |
| 7   | 78  | M   | 1st molar            | absence  | 1 month                    | resistant  | ESS                 |
| 8   | 41  | M   | 1st bicuspid         | presence | 3 months                   | resistant  | ESS                 |
| 9   | 55  | F   | 2nd bicuspid         | presence | 3 months                   | resistant  | ESS/exodontia       |
| 10  | 76  | M   | 1st molar            | presence | 1 month                    | responsive | —                   |
| 11  | 47  | M   | 2nd molar            | presence | 4 months                   | resistant  | ESS/exodontia       |
| 12  | 67  | F   | 1st molar            | presence | 3 months                   | resistant  | exodontia           |
| 13  | 64  | M   | 2nd bicuspid         | presence | 5 months                   | resistant  | ESS/exodontia       |
| 14  | 47  | F   | 1st molar            | presence | 3 months                   | resistant  | ESS/exodontia       |
| 15  | 19  | F   | 2nd bicuspid         | presence | 3 months                   | responsive | —                   |
| 16  | 61  | M   | 1st molar            | absence  | 2 months                   | responsive | —                   |
| 17  | 66  | M   | 1st and 2nd bicuspid | absence  | 2 months                   | responsive | —                   |
| 18  | 53  | M   | 2nd molar            | presence | 1 month                    | responsive | ESS/exodontia       |
| 19  | 45  | M   | 2nd molar            | presence | 2 months                   | resistant  | ESS/exodontia       |
| 20  | 26  | F   | 1st molar            | absence  | 4 months                   | resistant  | exodontia           |
